# Supplementary material
Source: HighWire-hosted journal article supplement (https://www.cmajopen.ca/highwire/filestream/80979/field_highwire_adjunct_files/0/open-2016-0059-1-at.pdf)
Supplement: open-2016-0059-1-at.pdf [file open-2016-0059-1-at.pdf]

**Appendix 1 (as supplied by the authors): Table 1.1 RAMQ definition of vulnerable patients by age or health condition in 2003**

| Patient defined as vulnerable if: | age            | <u>or at least one of the following health conditions:</u>                                                                                                                                                                                                                                                                                                                              |
|-----------------------------------|----------------|-----------------------------------------------------------------------------------------------------------------------------------------------------------------------------------------------------------------------------------------------------------------------------------------------------------------------------------------------------------------------------------------|
| <b>Criteria</b>                   | ≥ 70 years old | Psychosis, chronic obstructive pulmonary disease (COPD), moderate to severe asthma, pneumonia, cardiovascular disease, cancer associated with past, present, or future chemotherapy or radiotherapy treatments, cancer in a terminal phase, diabetes, alcohol or hard drug withdrawal, drug addiction treated with methadone, HIV/AIDS, or a degenerative disease of the nervous system |
